# Supplementary material for: Patterning order and disorder with an angle: modeling single-layer dual-phase nematic elastomer ribbons
Source: Royal Society of Chemistry journal article supplement (doi:10.1039/c8ra09375j), 2019-01-01
Supplement: c8ra09375j2.pdf [file c8ra09375j2.pdf]

Supplementary Information for

**Patterning order and disorder with an angle:  
Modeling single-layer dual-phase nematic elastomer ribbons**

*Vianney Gimenez-Pinto*<sup>1,2\*||</sup> and *Fangfu Ye*<sup>1,3,4</sup>

<sup>1</sup>*Beijing National Laboratory for Condensed Matter Physics & CAS Key Laboratory of Soft Matter Physics,  
Institute of Physics, Chinese Academy of Sciences, Beijing 100190, China*

<sup>2</sup>*Department of Chemical Engineering, Columbia University*

<sup>3</sup>*School of Physical Sciences, University of Chinese Academy of Sciences, Beijing 100049, China*

<sup>4</sup>*Songshan-Lake Materials Laboratory, Dongguan 523808, China*

*\*Current Addresses: Department of Physics and Astronomy, University of Pennsylvania and  
Department of Physics, Temple University*

*||Corresponding author: [vgimenezpinto@temple.edu](mailto:vgimenezpinto@temple.edu)*

**Supplementary Video 1:** *Actuation of a hybrid flat-twist ribbon with stripe-width/thickness ratio=40.0. Stripe pattern has an angle  $\psi = 90$  degrees and the twist-nematic director configuration has an offset angle  $\theta = 45$  degrees. During a transient time, sample show chiral saddles in active nematic region and saddles with opposite chirality in the inactive isotropic regions. This short-lived deformation (first second of video) is consequence of adjacent strains produced by the morphing of the nematic stripes. Isotropic regions are then allowed to relax and find equilibrium in a flat state.*
